# Supplementary material
Source: PubMed Central journal article supplement (PMC4546858)
Supplement: NIHMS707546-supplement-1.pdf [file NIHMS707546-supplement-1.pdf]

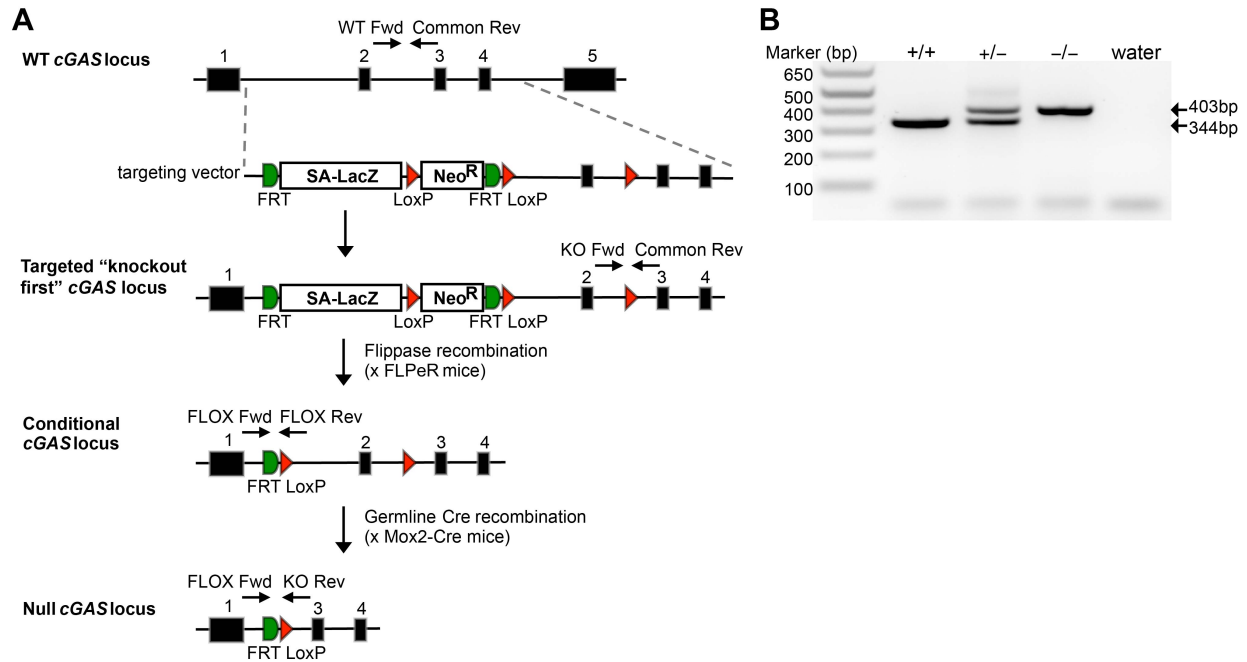

### Supplementary Figure 1: Generation of *cGAS*-deficient mice

(A) Schematic of the wild-type and targeted *cGAS* (*Mb21d1*) locus. Exons are indicated with solid black squares and primers used for genotyping PCR are indicated with arrows. The targeted "knockout first" locus contains a strong splice acceptor (SA) in the LacZ cassette, resulting in a truncated *cGAS* transcript in which exon 1 is spliced into the LacZ cassette. The majority of *cGAS*<sup>-/-</sup> mice used in this manuscript carry this "knockout first" null allele of *cGAS*, including all mice crossed to *Trex1*<sup>-/-</sup> mice. The *cGAS*<sup>-/-</sup>*Trex1*<sup>+/+</sup> mice used as controls in Figures 2 and 3 carry the final null *cGAS* allele that was generated as follows: mice with a conditional *cGAS*<sup>FLOX</sup> allele were generated by crossing to FLPeR mice (1) to remove the FRT-flanked LacZ and Neo cassettes; mice with the final null *cGAS* allele were generated by crossing *cGAS*<sup>FLOX</sup> mice to Mox2-Cre mice (2) for germline excision of the LoxP-flanked exon 2. The *cGAS*<sup>FLOX</sup> and final *cGAS* alleles were detected with the following primers: FLOX Fwd, AAGGCGCATAACGATAACCACG; FLOX Rev, GCTGGGTCTAGATATCTCGAC; and KO Rev, AAGGGCACTGAGCCTCTGAG. (B) Genotyping PCR to distinguish *cGAS*<sup>+/+</sup>, *cGAS*<sup>+/-</sup>, and *cGAS*<sup>-/-</sup> mice carrying the "knockout first" *cGAS* allele.

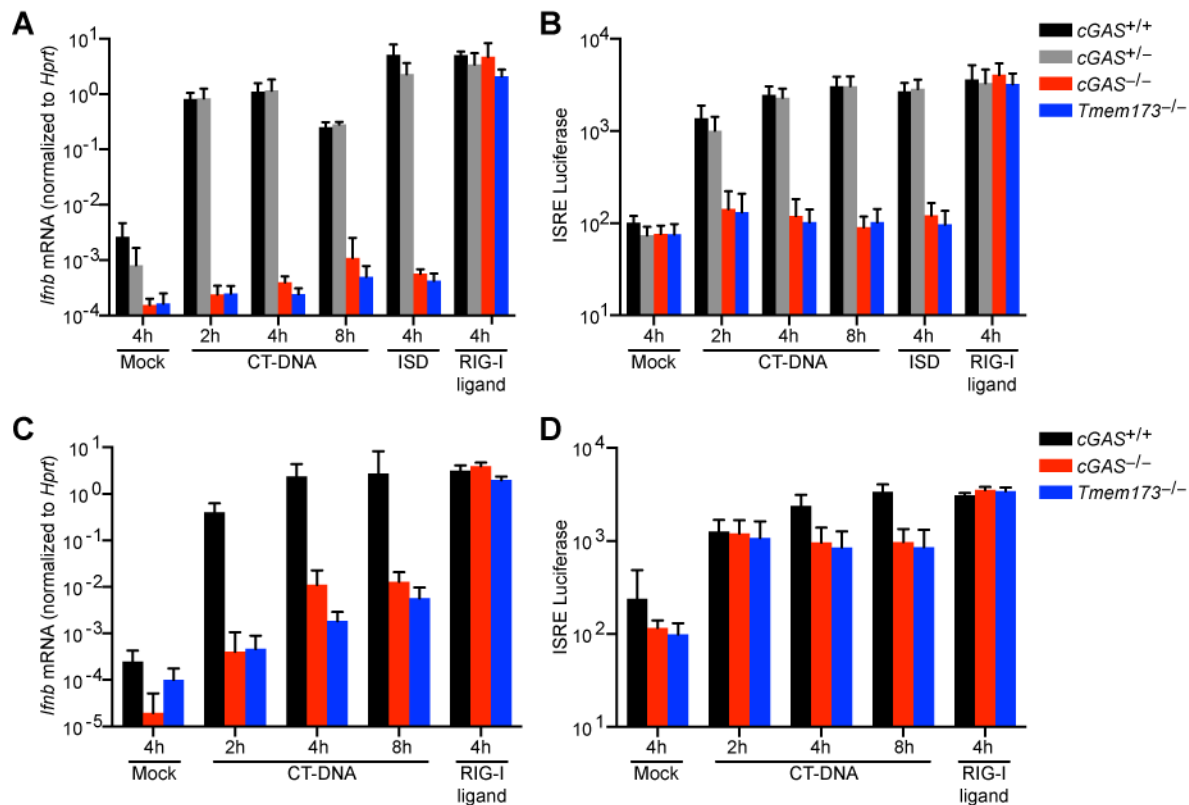

## Supplementary Figure 2: Characterization of the IFN response in cGAS-deficient cells

**(A)** Quantification of *Ifnb* mRNA induction in bone marrow-derived macrophages from *cGAS*<sup>+/+</sup>, *cGAS*<sup>+/-</sup>, *cGAS*<sup>-/-</sup>, or *Tmem173*<sup>-/-</sup> (STING-deficient) mice transfected with calf-thymus DNA (CT-DNA), ISD 100-mer oligonucleotides (3), or RIG-I ligand (4) for 2h, 4h, or 8h as indicated. **(B)** Quantification of type I IFN production (right panel) using an IFN bioassay with supernatants from bone marrow-derived macrophages stimulated with the indicated ligands as in (A). **(C)** Quantification of *Ifnb* mRNA induction in mouse embryonic fibroblasts (MEFs) from *cGAS*<sup>+/+</sup>, *cGAS*<sup>-/-</sup>, or *Tmem173*<sup>-/-</sup> (STING-deficient) embryos stimulated as in (A). **(D)** Quantification of type I IFN production (right panel) using an IFN bioassay with supernatants from MEFs stimulated with the indicated ligands as in (C). Data are representative of two experiments.

## Supplementary References

1. Farley, F. W., P. Soriano, L. S. Steffen, and S. M. Dymecki. 2000. Widespread recombinase expression using FLP<sub>er</sub> (flipper) mice. *Genesis* 28: 106-110.
2. Tallquist, M. D., and P. Soriano. 2000. Epiblast-restricted Cre expression in MORE mice: a tool to distinguish embryonic vs. extra-embryonic gene function. *Genesis* 26: 113-115.
3. Stetson, D. B., and R. Medzhitov. 2006. Recognition of cytosolic DNA activates an IRF3-dependent innate immune response. *Immunity* 24: 93-103.
4. Saito, T., D. M. Owen, F. Jiang, J. Marcotrigiano, and M. Gale, Jr. 2008. Innate immunity induced by composition-dependent RIG-I recognition of hepatitis C virus RNA. *Nature* 454: 523-527.
